# Supplementary material for: Enhancement of capacitance in CNT based supercapacitors by incorporating a Mg3(PO4)2/CuSO4 porous composite on their electrodes
Source: Royal Society of Chemistry journal article supplement (doi:10.1039/d4nj03051f), 2024-01-01
Supplement: d4nj03051f1.pdf [file d4nj03051f1.pdf]

### Supporting Information

#### Enhancement of capacitance in CNT based supercapacitors by incorporating $\text{Mg}_3(\text{PO}_4)_2/\text{CuSO}_4$ porous composite on their electrodes

Javier Rios-Orihuela, Jorge Oliva, Tzipatly Esquivel-Castro, Cecilia Mercado-Zuñiga, Arturo I. Martinez, and Christian Gomez-Solis

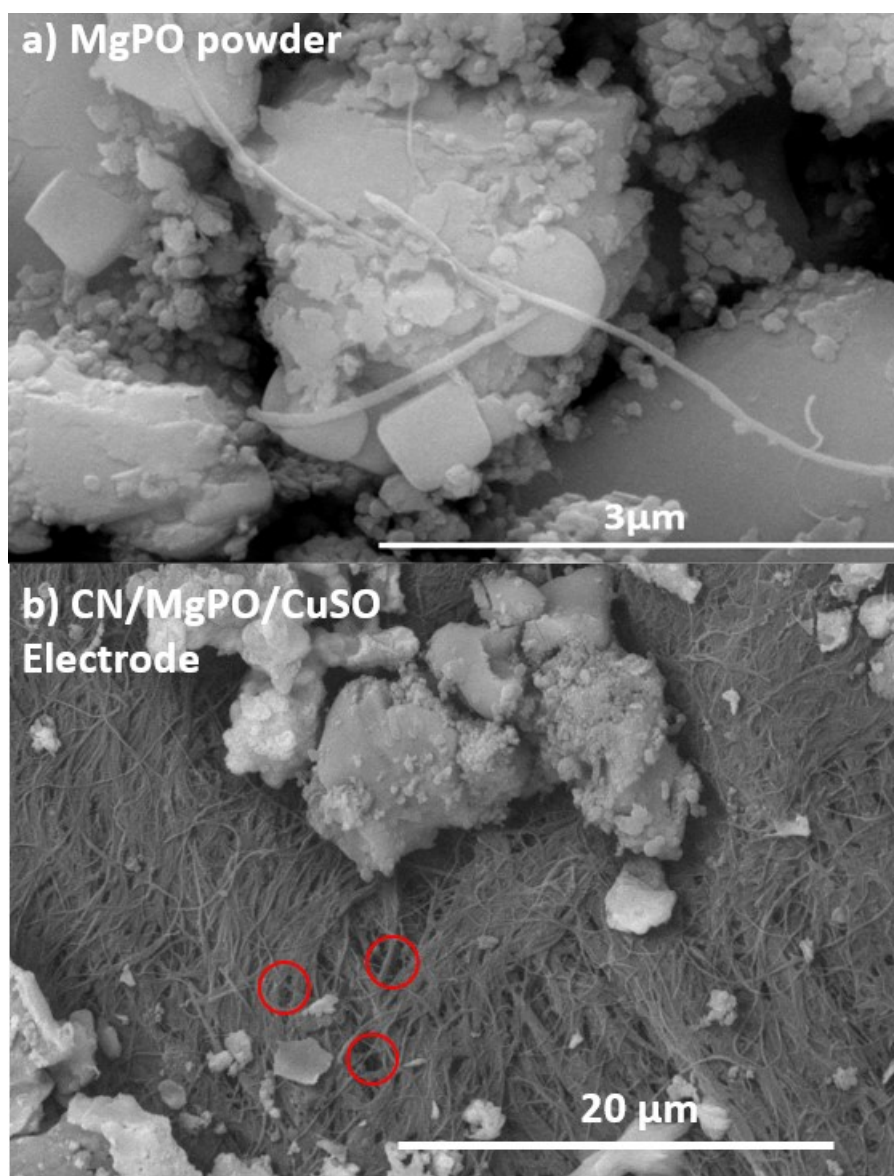

**Figure S1.** Zoomed view for a) MgPO powder and b) CN/MgPO/CuSO electrode.

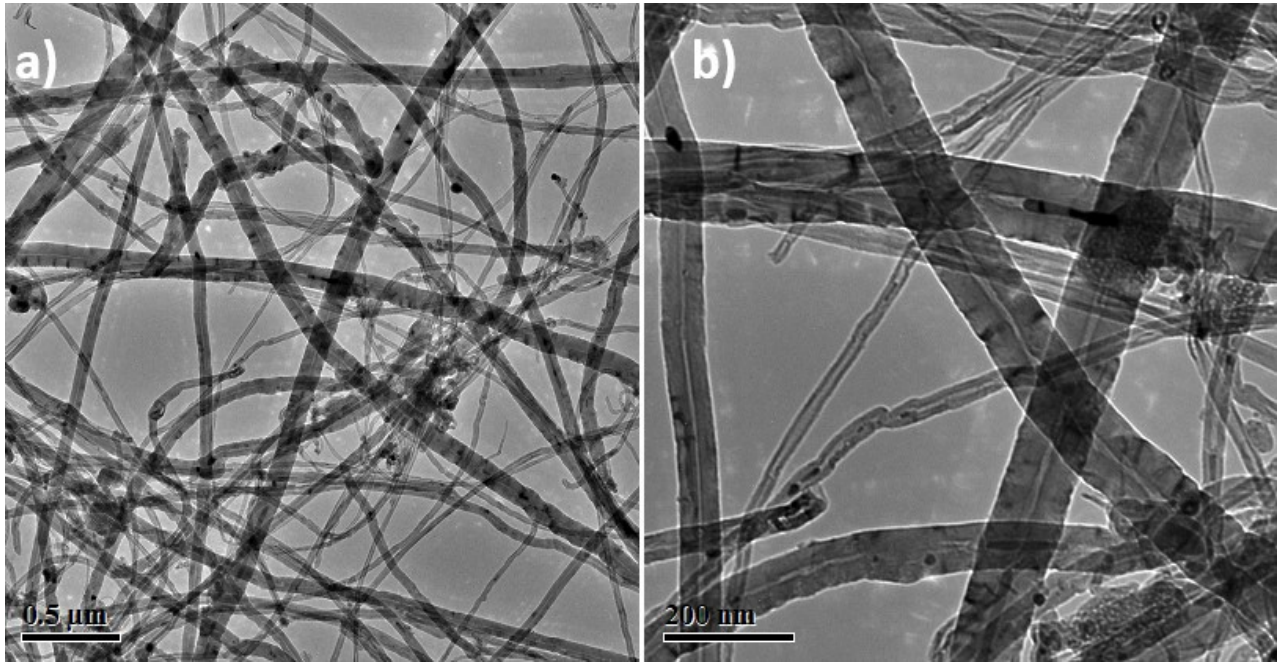

**Figure S2.** TEM images for the CNTs utilized for the construction of the SC electrodes.

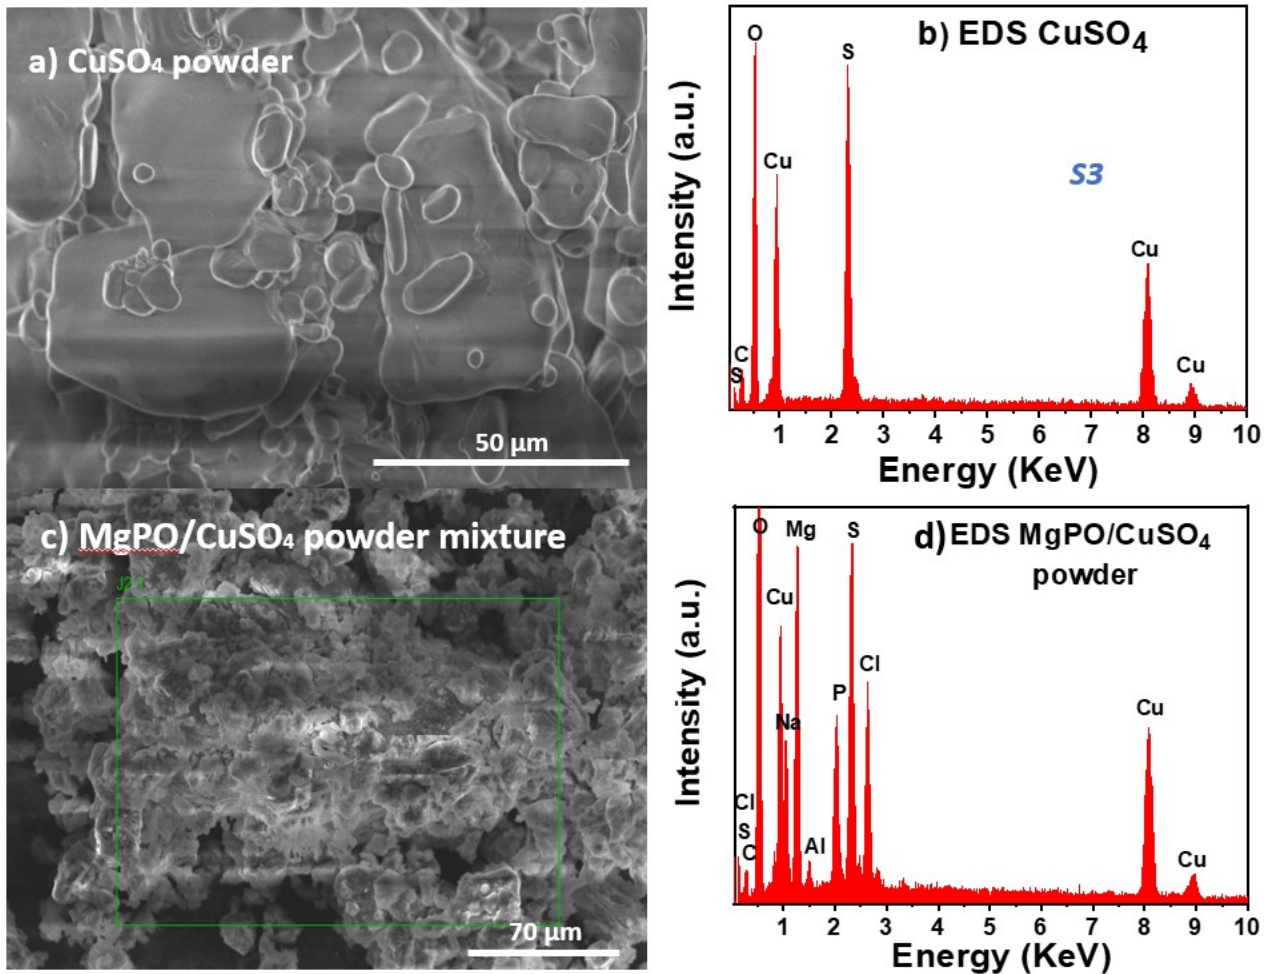

**Figure S3.** a) and b) are SEM images and EDS spectra for the  $\text{CuSO}_4$  powder, respectively. b) and c) are SEM images and EDS spectra for the  $\text{MgPO}/\text{CuSO}_4$  powder mixture, respectively.

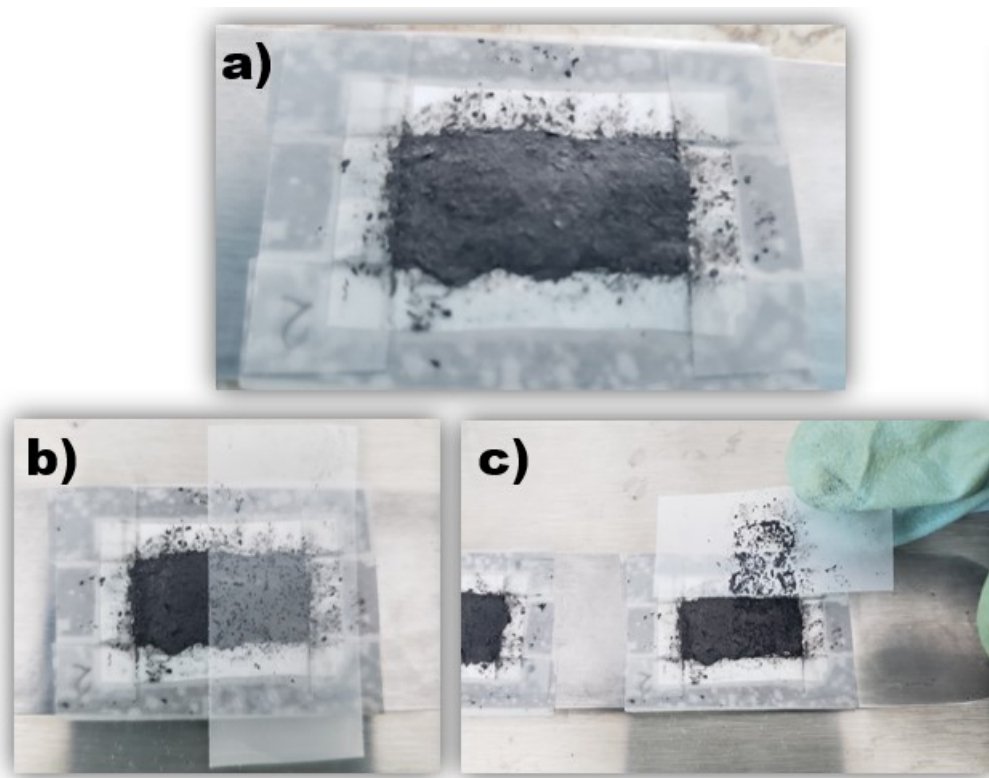

**Figure S4.** Test of Adherence for the SC electrodes utilized in this research.

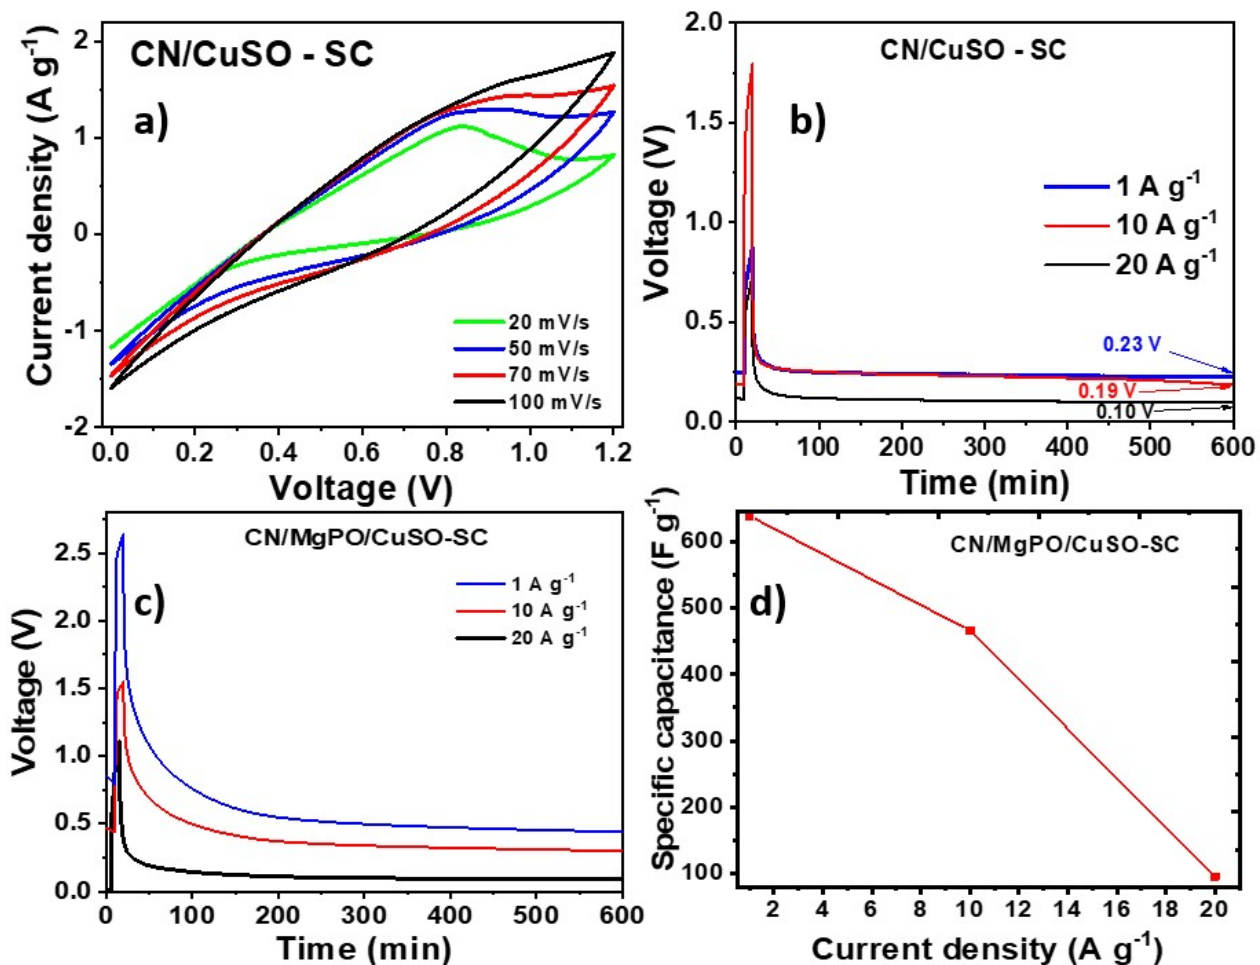

**Figure S5.** a) and b) are the CV and GCD curves for the device only made with  $\text{CuSO}_4$  on the CN electrodes. c) shows the GCD curves for the CN/MgPO/CuSO-SC device as a function of current density. d) shows the values of capacitance for the CN/MgPO/CuSO-SC device as a function of current density.



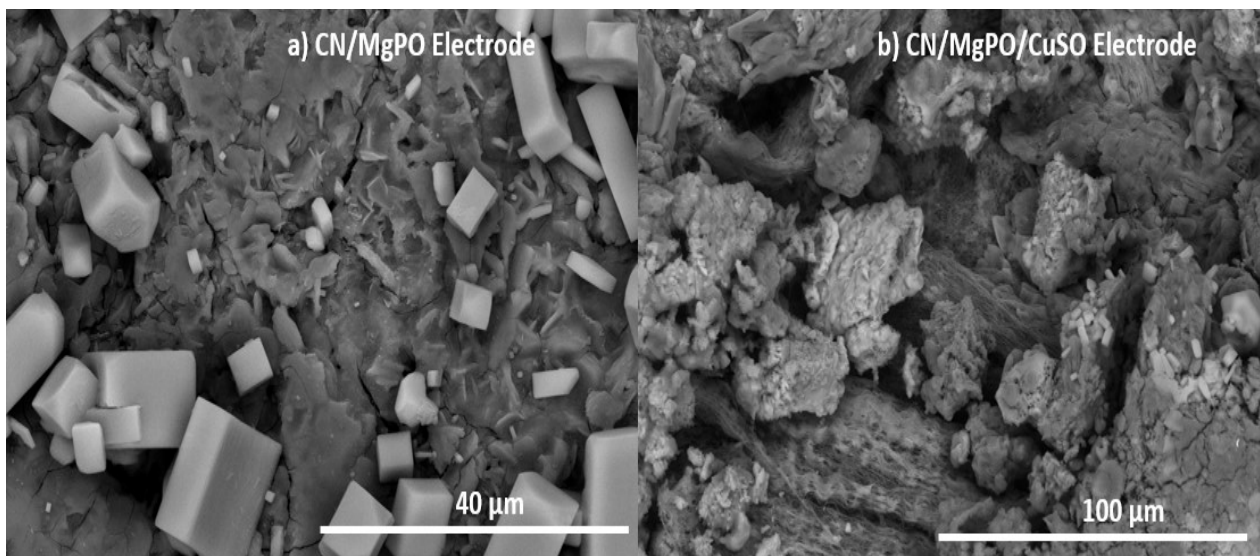

**Figure S6.** SEM images for: a) CN/MgPO and b) CN/MgPO/CuSO electrodes used in the SCs.

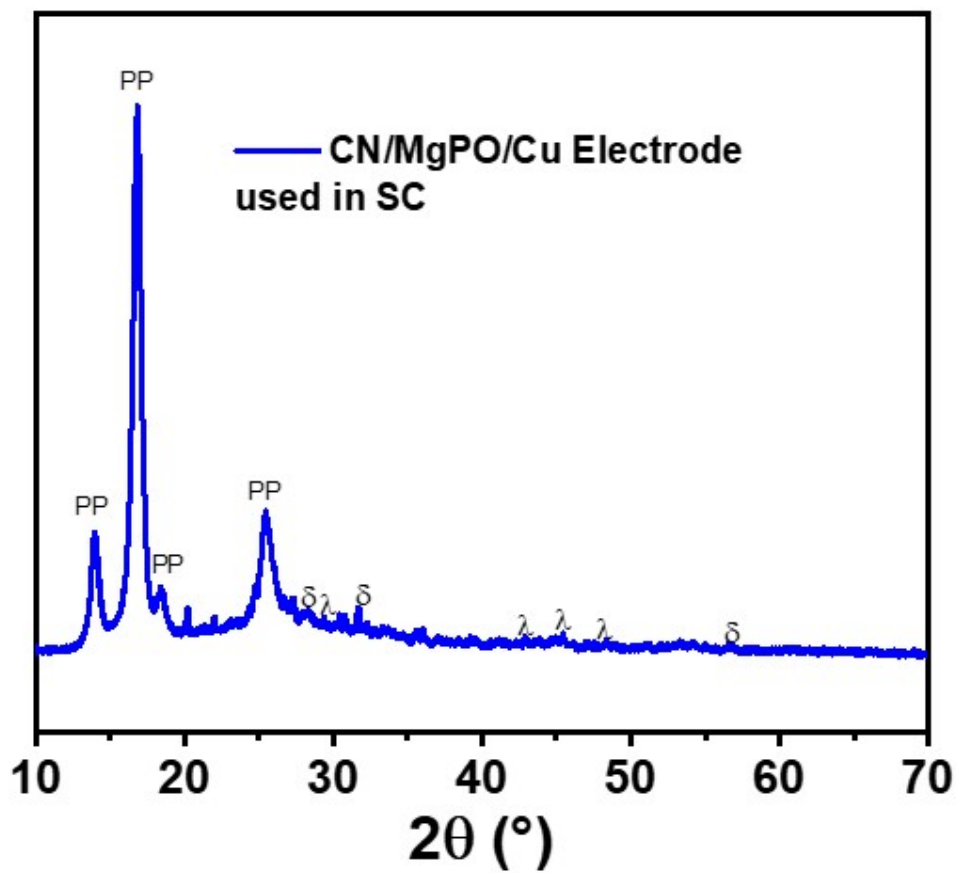

**Figure S7.** XRD pattern for the CN/MgPO/CuSO electrode used in the SC.
